# Supplementary figures and images for: Characterization of methionine dependence in melanoma cells
Source: Royal Society of Chemistry journal article supplement (doi:10.1039/d3mo00087g), 2023-08-31

Network 1 : MeWo proteome - 25% : MeWo proteome : MeWo proteome - 25%

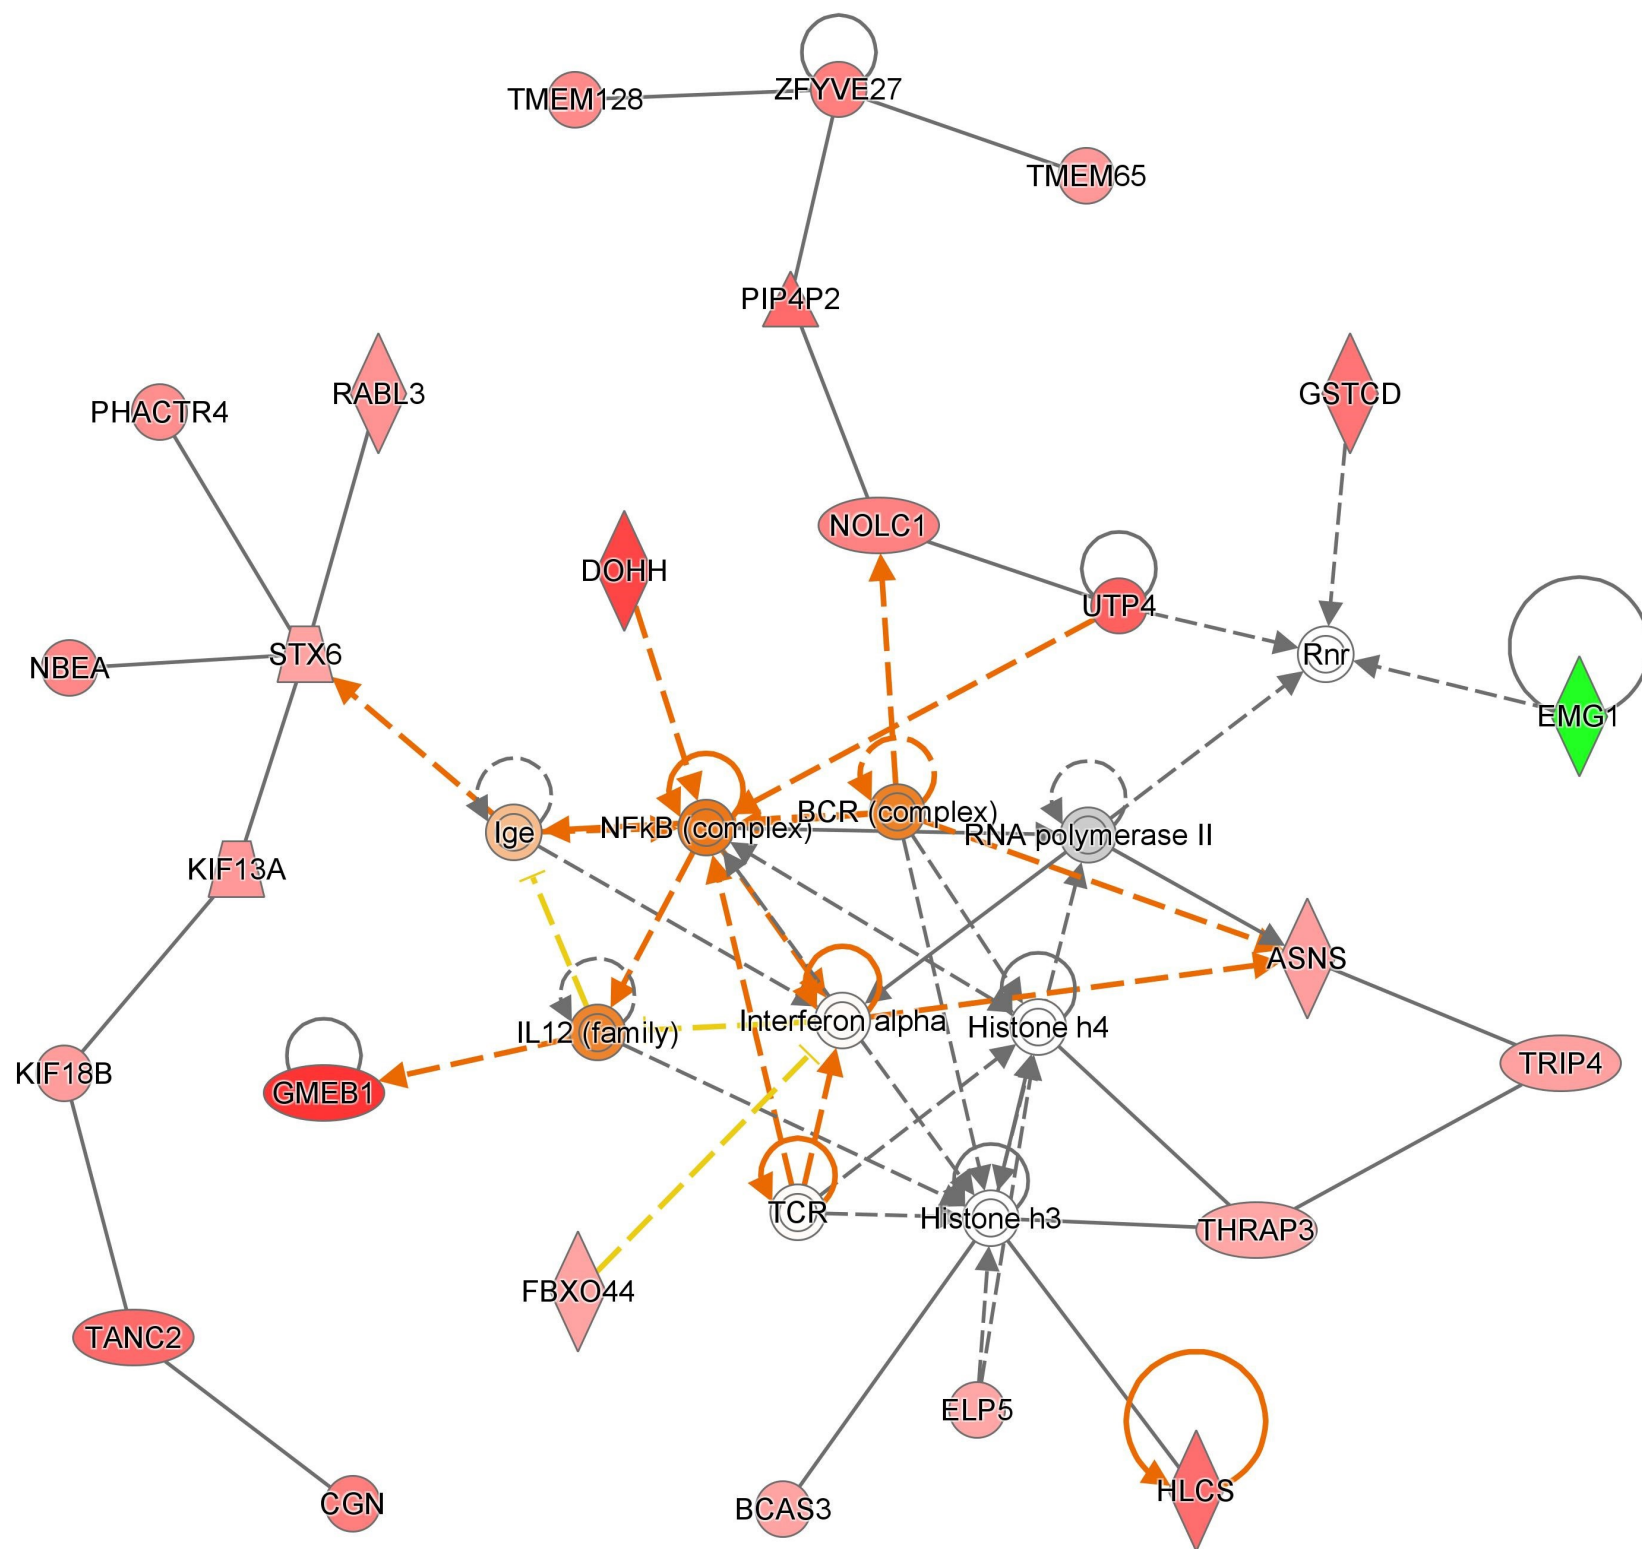

Supplement: d3mo00087g5.pdf [file d3mo00087g5.pdf]

# **A** *LINE-1* methylation

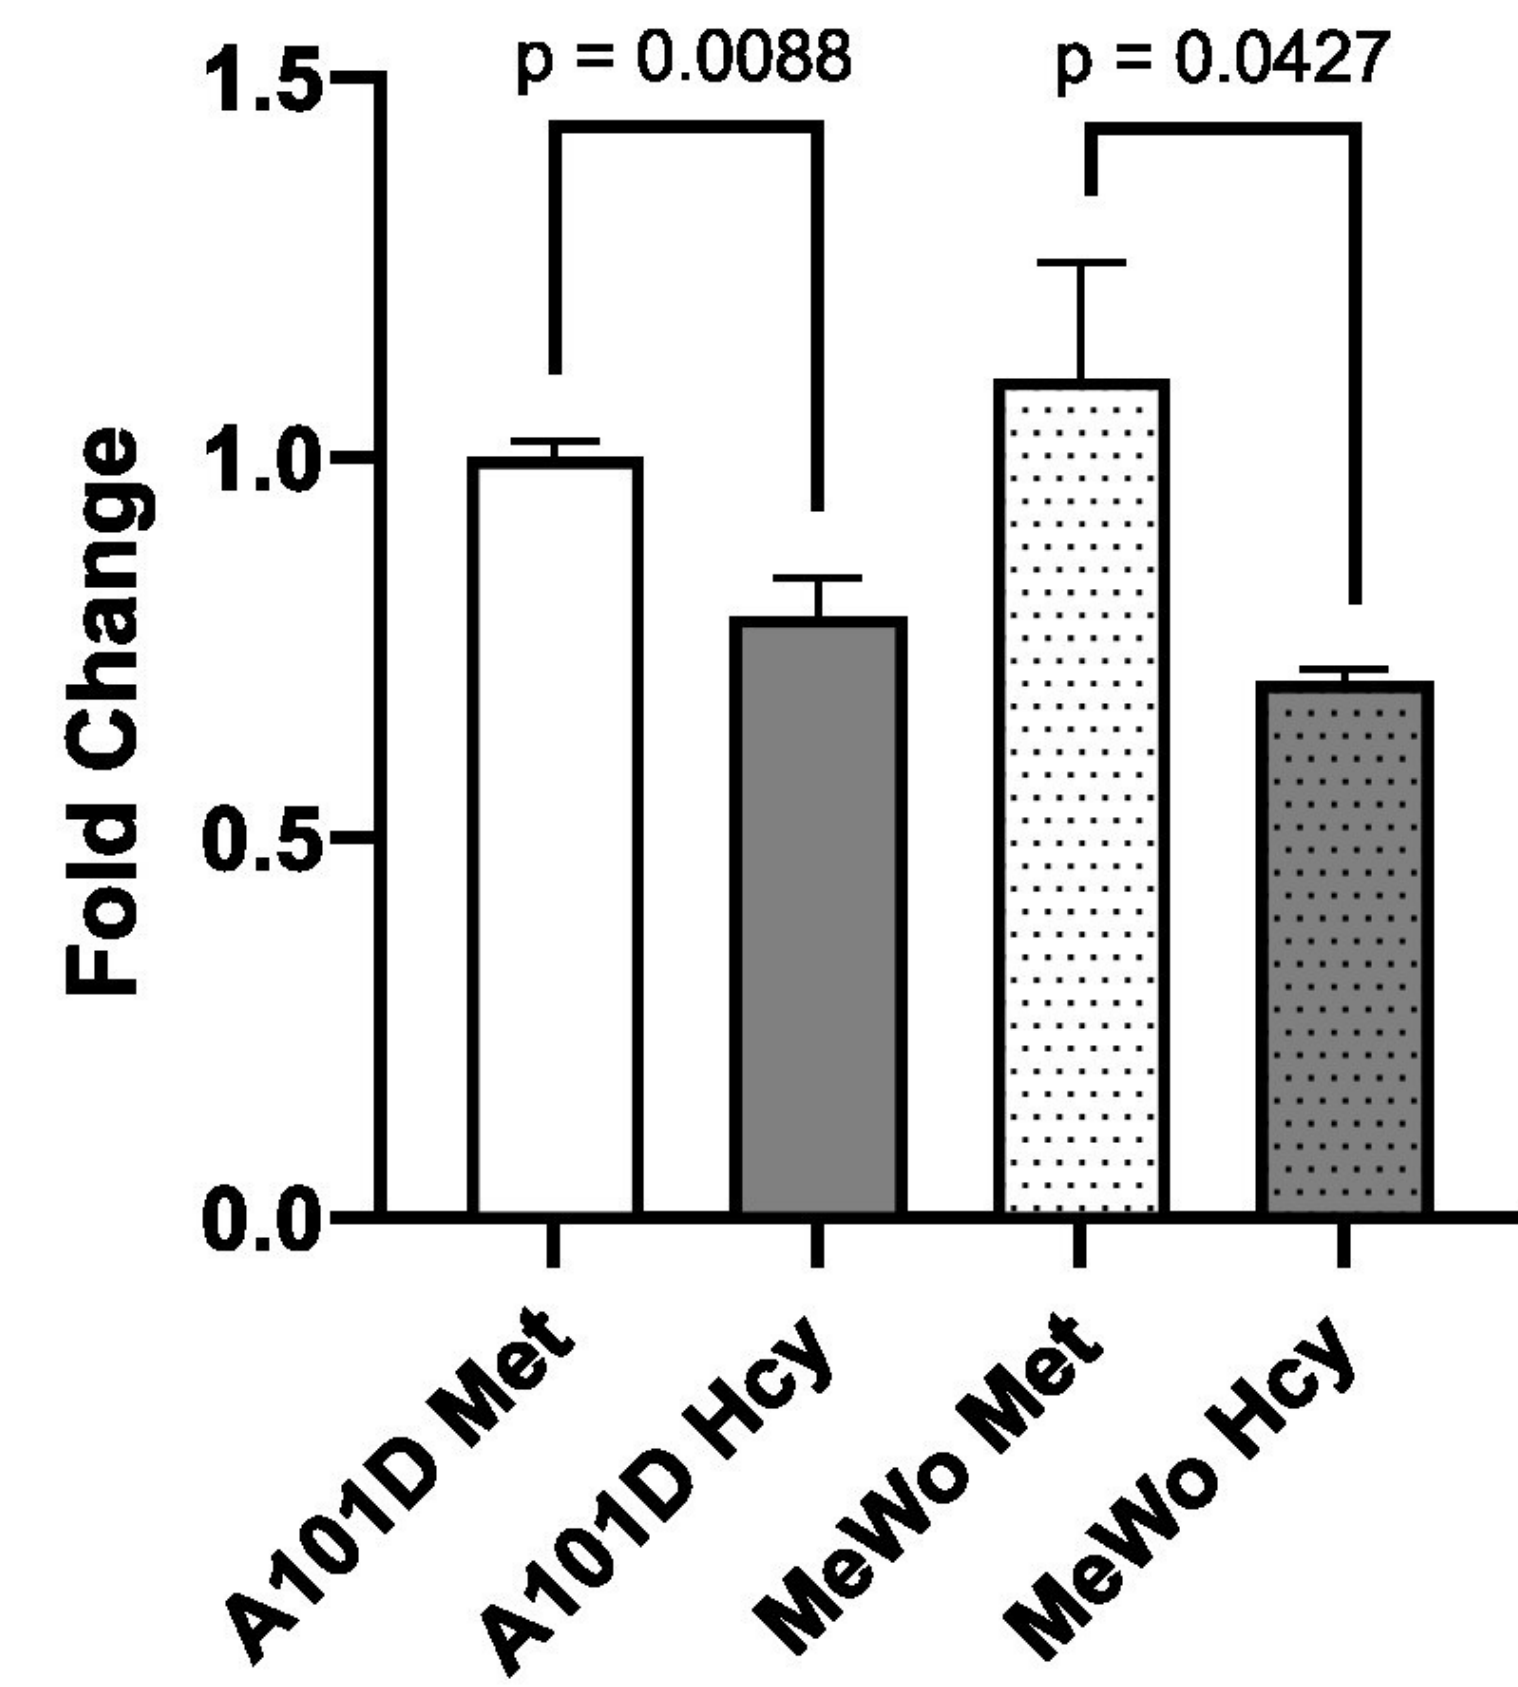

# **B** *MAT2A*

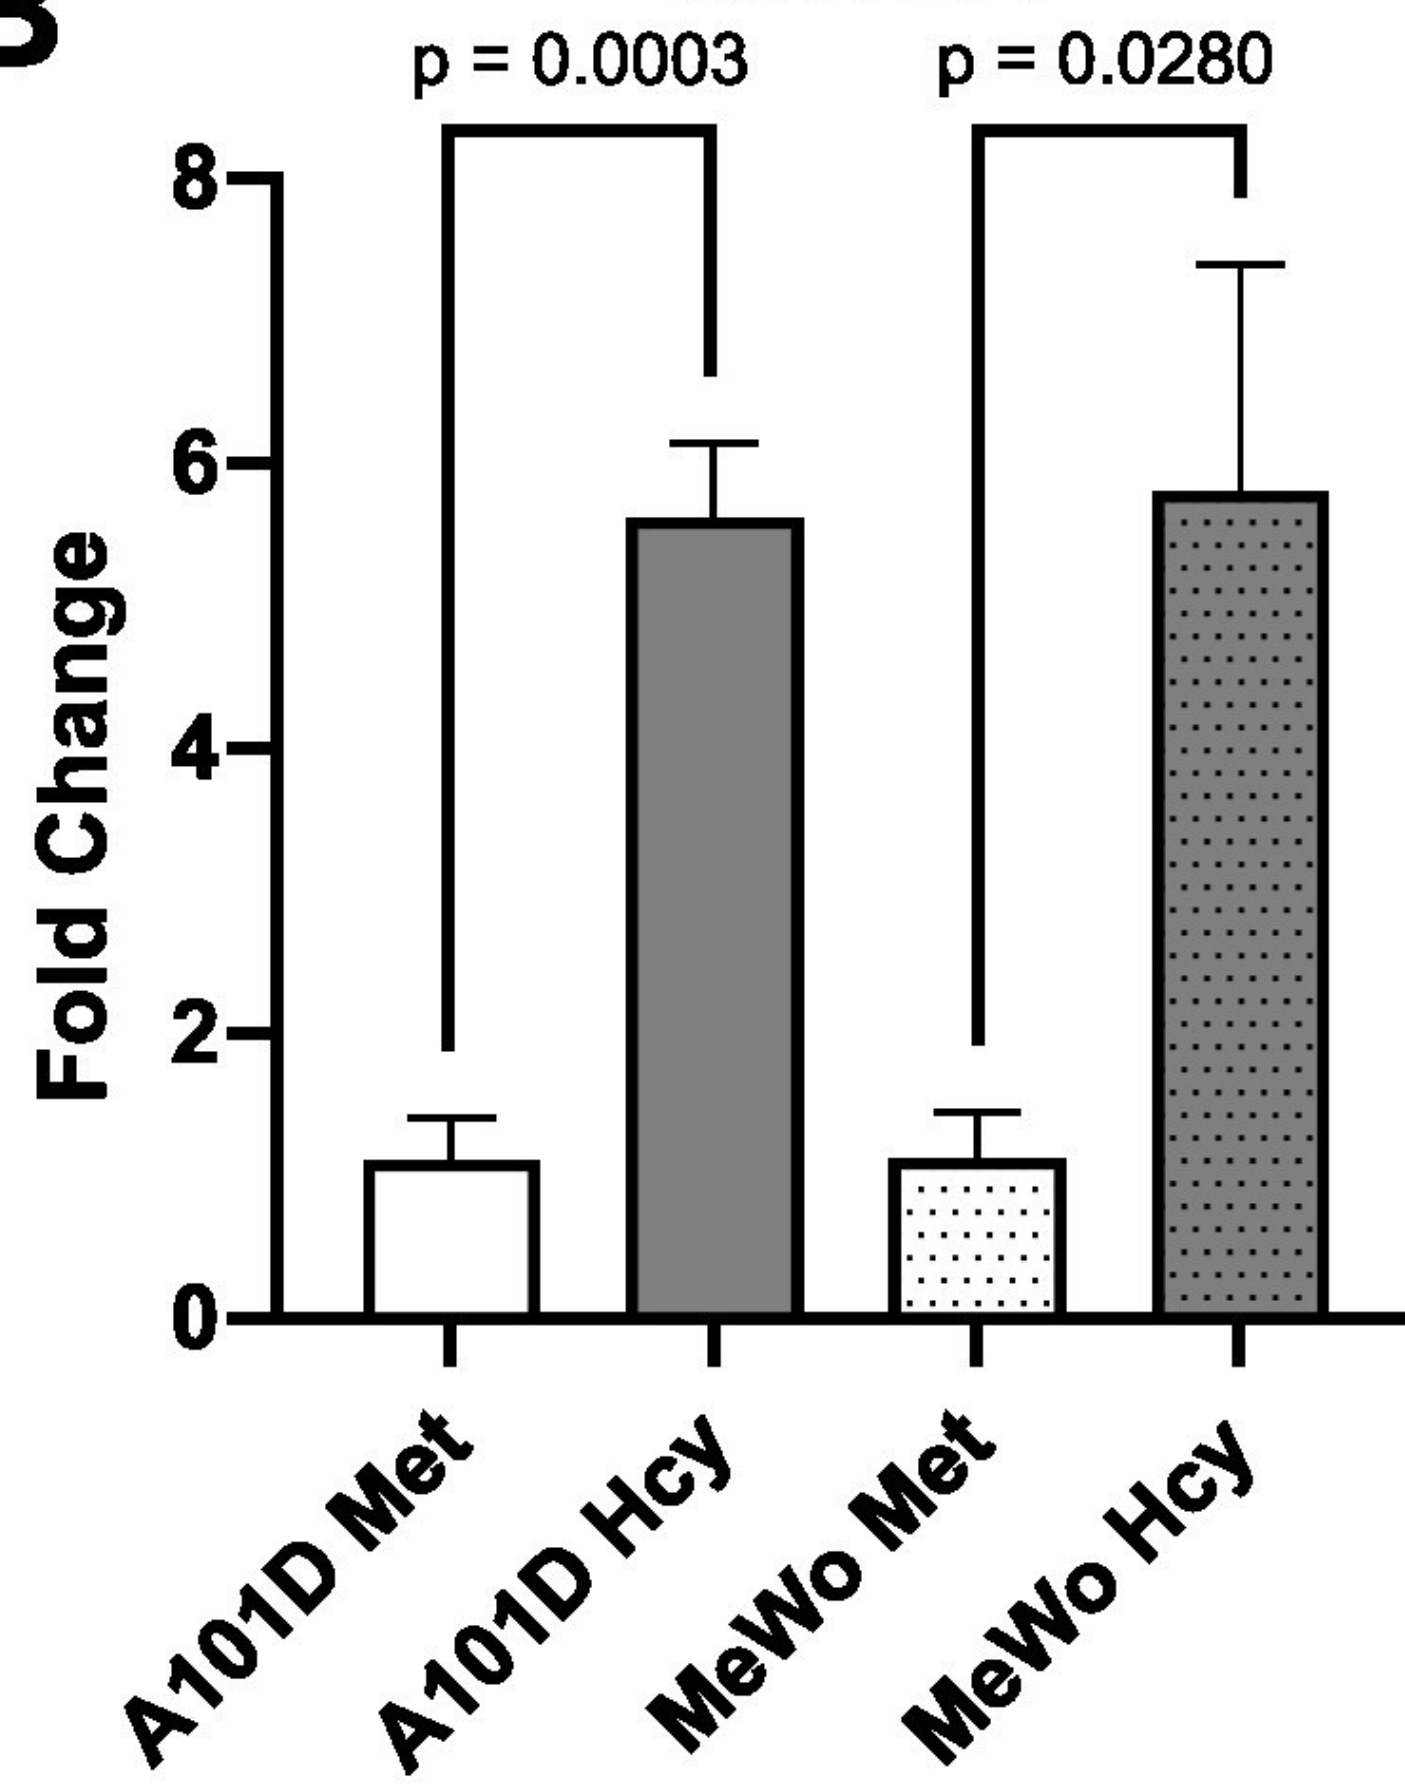

# **C**

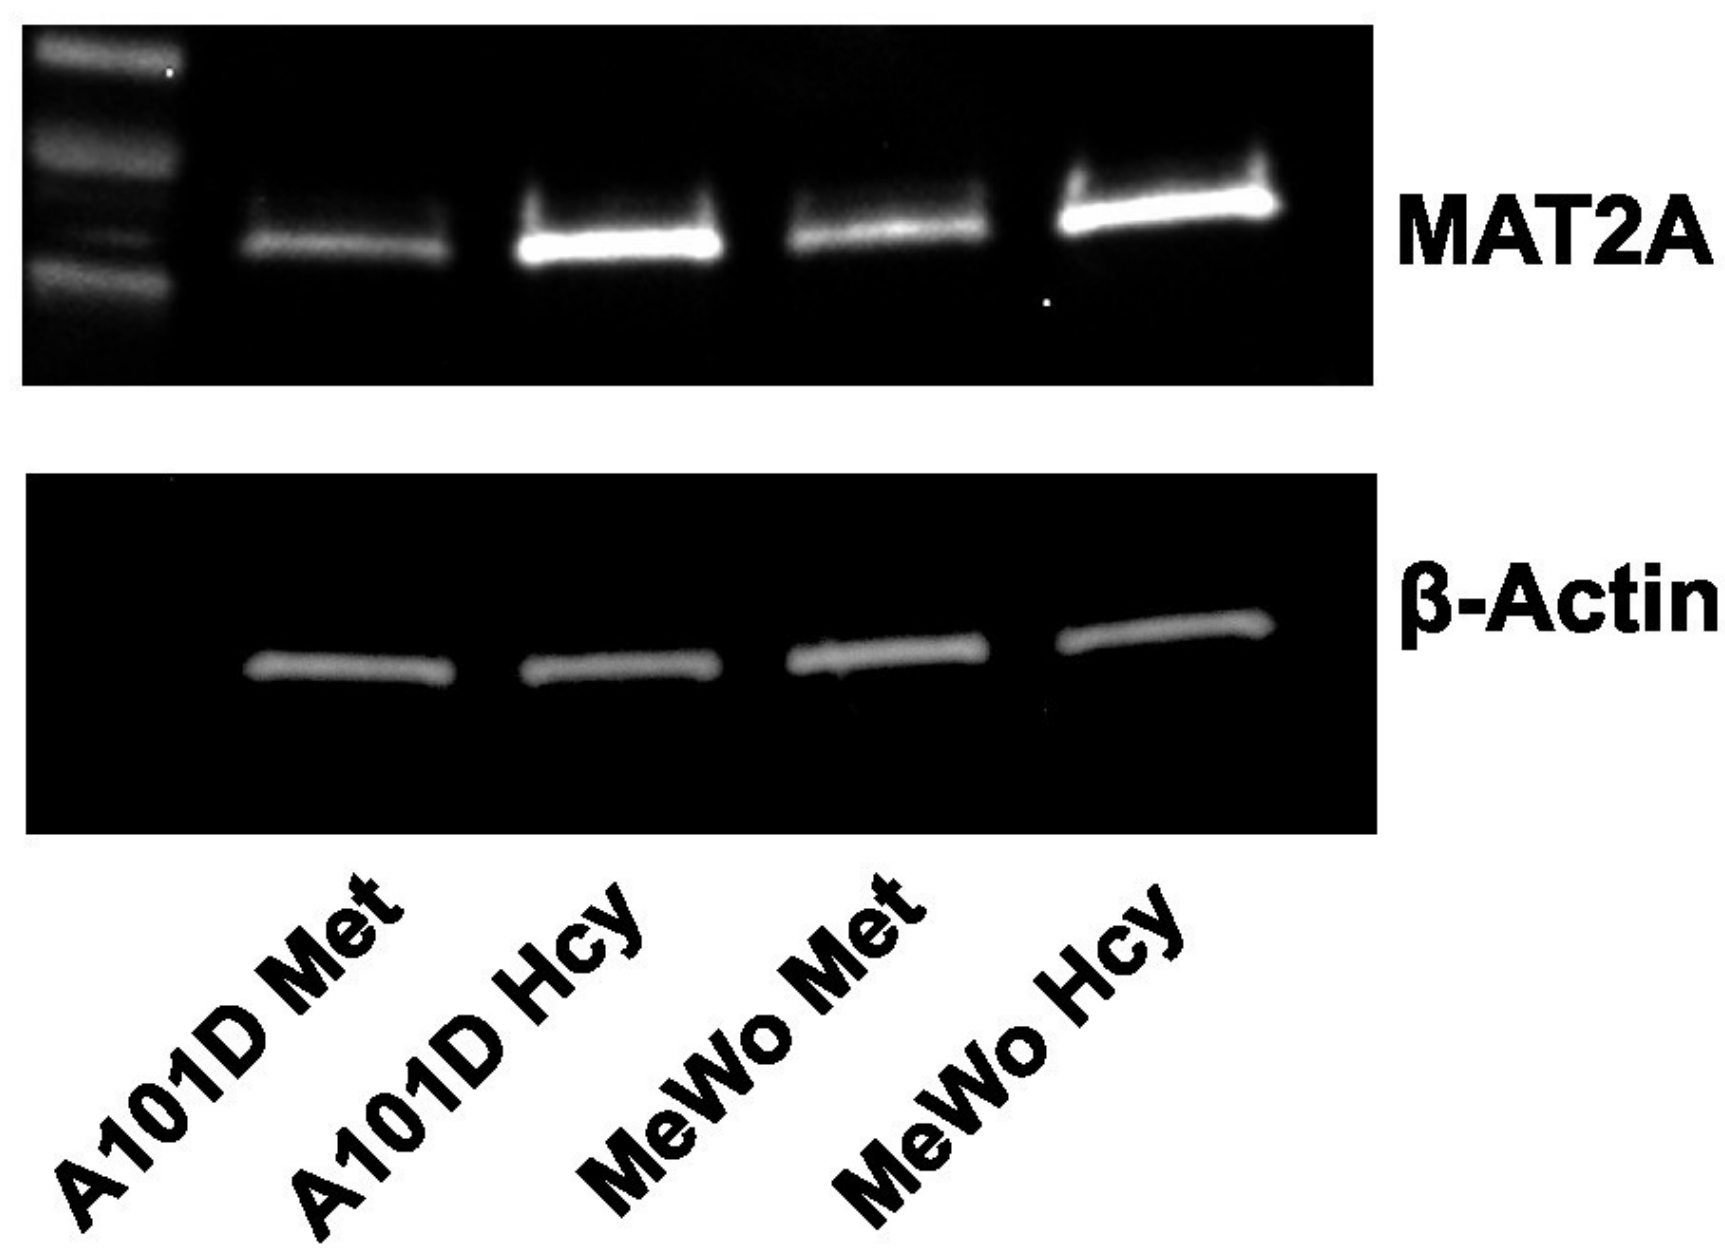

# **D** *STING*

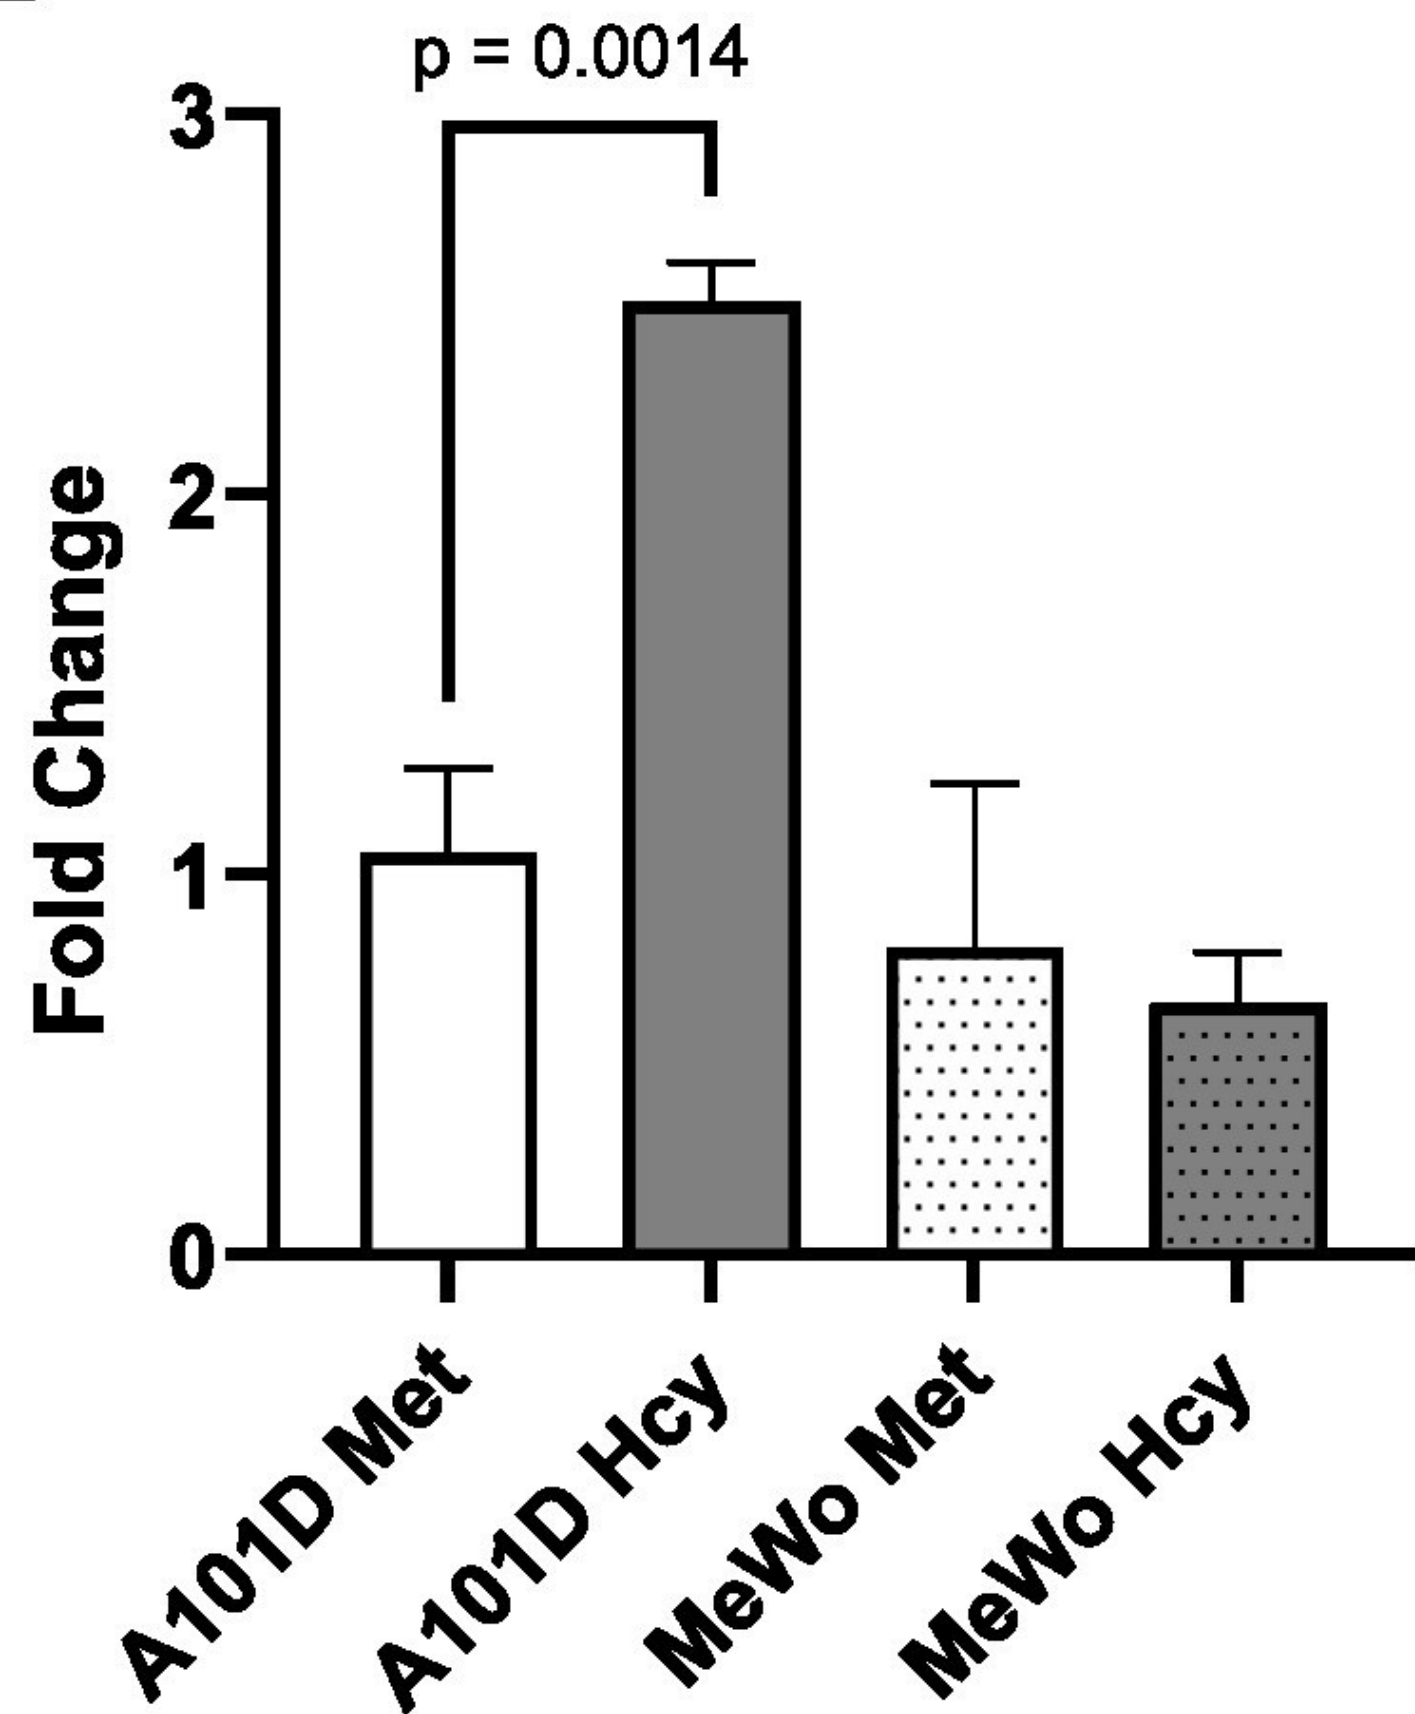

Supplement: d3mo00087g6.pdf [file d3mo00087g6.pdf]
